# Supplementary material for: Assessment of Arctic Sea Ice Thickness Retrieval Ability of the Chinese HY-2B Radar Altimeter
Source: Copernicus journal article supplement (doi:10.5194/egusphere-2022-870), 2022-09-21
Supplement: Supplementary file [file egusphere-2022-870-AC1-supplement.pdf]

Dear Editors and Reviewers,

Thank you for considering our manuscript, and the reviewers' comments concerning our manuscript entitled Assessment of Arctic Sea Ice Thickness Retrieval Ability of the Chinese HY-2B Radar Altimeter (manuscript ID: egosphere-2022-870). The comments are all valuable and very helpful for improving upon our paper. We have now carefully reviewed and addressed all of comments which we hope meet with approval, with revisions to the original manuscript shown in red. The primary corrections in the paper and the responds to the reviewer's comments are as flowing:

## **Responses to Reviewer's Comments:**

### **Reviewer #1:**

---

#### **General comments**

According to your valuable comments, we change the retrieval method of HY-2B. If there are more than 15 points within 25 km section, we take the average of the 15 lowest values as the SSHA. Otherwise set as nan, and interpolate the SSHA along track. We find that the correlation between the retrieved sea ice freeboard and OIB sea ice freeboard is 0.77, with a RMSE is 0.13 m, and a MAE is 0.12 m. Therefore, we update our method and find the optimal threshold of 15 points within 25 km segment. If there are more than 15 points within 25 km section, we take the average of the 15 lowest values as the SSHA, otherwise set as nan, and interpolate the SSHA along track.

**GC0: I am not convinced of the soundness of the freeboard retrieval methodology presented in this study.** While they refer to the study of Kwok et al. (2007) for the retrieval methodology, that study used laser observations rather than radar, which are not as impacted by speckle and noise as radar observations. They also refer to the study of Zhang et al. (2021) that applied a similar (although not entirely same processing chain) to Envisat freeboards, and produced reasonable results, however I am in earnest also not fully convinced of their methodology either. There are some assumptions that I question, and **I therefore hope that the authors can present some more results regarding the validity of their methodology - and why they decide to use this methodology instead of the more commonly used methodology of classifying waveforms as either leads/floes based on shape** (e.g., Tilling et al. 2018, Ricker et al. 2014, Hendricks and Ricker 2020). This includes for example:

- **Can you be sure that the lowest 9 points are in truth from leads? What if all points within the segment are from floes (or negative freeboards, e.g., Figure 4)? If you select them as leads, you will bias the SSHA.**

**Response:** Thank you for the valuable comments. The HY-2B altimeter uses two different tracking modes: suboptimal maximum likelihood estimation (SMLE) and offset center of gravity (OCOG). The two tacking modes can exchange according to the observation

surfaces. The HY-2B Level-2 altimetry products (SGDR products) we used do not have OCOG data.

Pulse peakiness (PP) reflects the acuteness of the shape of the returned waveform peak. Lead-reflected waveforms have a peakier shape with higher power than those reflected by ice. Consequently, PP has been widely used to distinguish leads from ice floes in pulse limited radar altimeter data (Peacock et al., 2004; Connor et al., 2009) and SAR altimeter data (Laxon et al., 2013).

As shown in Figure 1 and Figure 2, we used PP value greater than 10 to obtain the SSHAs using nearest interpolation but did not yield satisfactory results. In addition, we only extracted 4 lead points on a track number of 14418 (1118 floe points) according to PP value greater than 10. We also used other PP thresholds (3, 7 and 15) to extract lead points (461, 11 and 2), but didn't obtain satisfactory results.

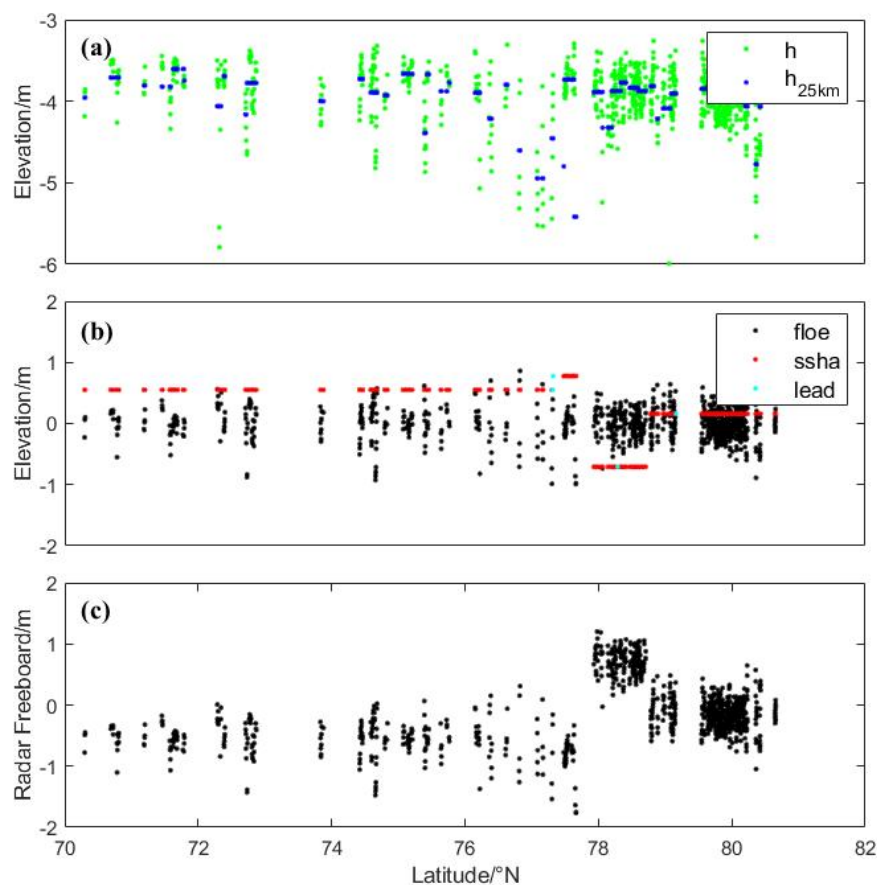

Figure 1. A sample of the HY-2B elevation profile obtained for of track number 14418 on April 4, 2020. The green points in panel (a) are the relative elevation ( $h$ ) values; the blue points in panel (a) are the  $h_{25km}$  values, defined as the 25-km running mean of  $h$ ; the black points in panel (b) are the modified relative elevation ( $h_r$ ) values; the red points in panel (b) are the sea surface height anomaly (SSHA) values; the azury points in panel (b) are lead points extracted by PP values greater 10; and the black points in panel (c) are the radar freeboard values.

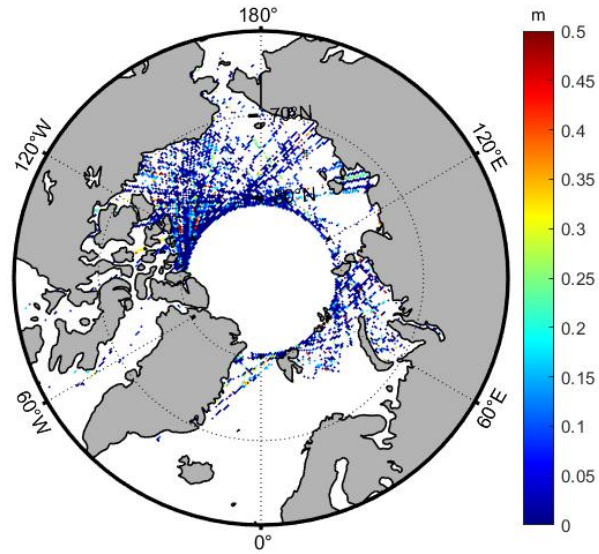

Figure 2. Radar freeboard retrieved by PP value greater than 10 in April 2020.

Additionally, we attempted to extract leads using MODIC lead products (Hoffman et al., 2019, obtained at <ftp://frostbite.ssec.wisc.edu>) to retrieve the radar freeboard, but we were not successful, as shown in Figure 3 and Figure 4. We think there are three possible reasons. Firstly, the SGDR products have been re-tracked for Brown model, which isn't suitable for the retrack of sea ice. The retrack algorithm is different from other retrack algorithms, such as TFMRA (threshold first maximum retracker algorithm) and SAMOSA+ (Synthetic Aperture Radar Altimetry MOde Studies and Applications +). Secondly, the SGDR products have rare effective data points in each track, resulting in rare lead points being extracted using these two methods as well. Consequently, there is a significant error in the interpolation of the SSHAs caused by the rare leads. Thirdly, the classification of floe and lead isn't precise, which we need to improve the algorithm of classification.

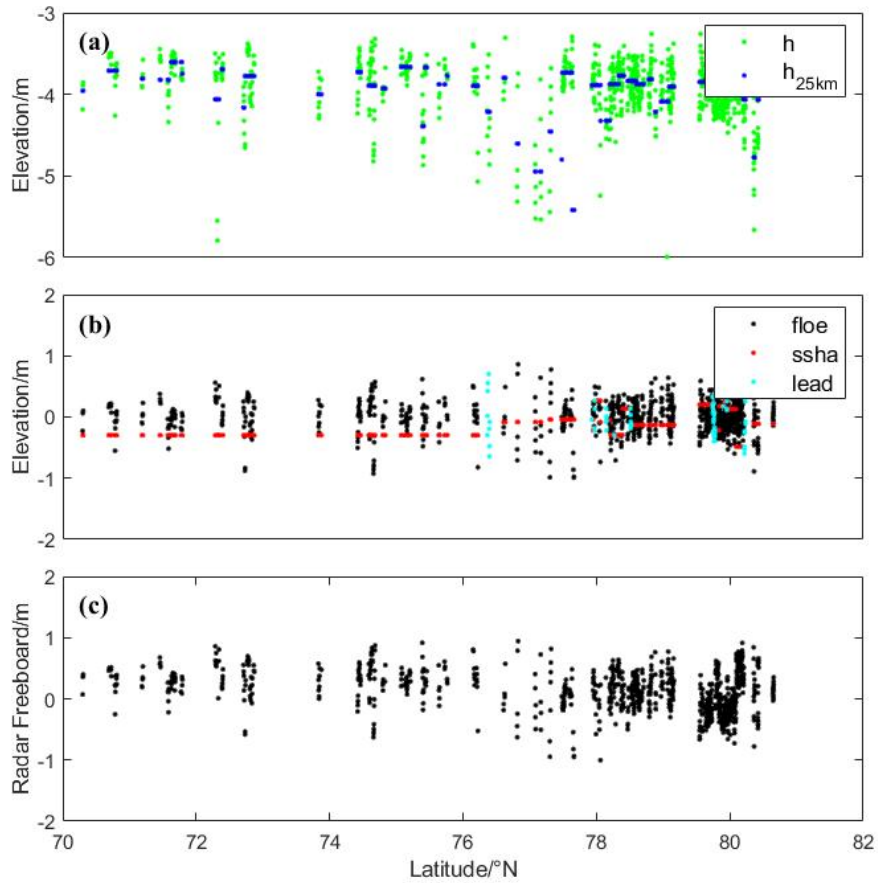

Figure 3. A sample of the HY-2B elevation profile obtained for of track number 14418 on April 4, 2020. The green points in panel (a) are the relative elevation ( $h$ ) values; the blue points in panel (a) are the  $h_{25km}$  values, defined as the 25-km running mean of  $h$ ; the black points in panel (b) are the modified relative elevation ( $h_r$ ) values; the red points in panel (b) are the sea surface height anomaly (SSHA) values; the azury points in panel (b) are lead points extracted by MODIC lead product; and the black points in panel (c) are the radar freeboard values.

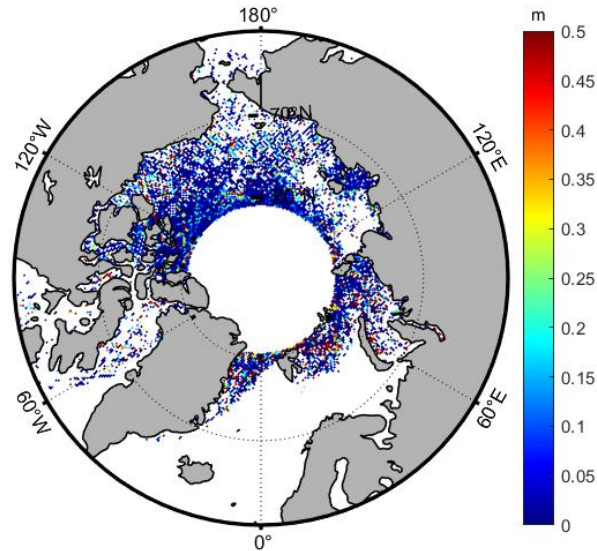

Figure 4. Radar freeboard retrieved by MODIS lead product in April 2020.

Honestly, I can't be sure that the lowest 9 points are in truth from leads. Radar freeboard will be lower if all points within the segment are from floes (or negative freeboards), especially leads are sparse in late winter and spring. According to Tilling et al. (2019), the quality of the interpolated SSH will depend on the number of available lead measurements. When the number of valid data points in each track of the data set is smaller, this method will generate a smaller deviation than the two previous approaches. We are so sorry for that we didn't retrieve the satisfactory results based on PP value. But we will try to use HY-2B L1 data to retrieve radar freeboard using waveform feature to extract lead, which will be described in detail in subsequent articles. The quality of the interpolated SSHA will be improved with more available lead measurements.

• **How big of an impact do you estimate this SSHA methodology to make (e.g., the behavior you point out in Figure 5b+d+f+h)? I appreciate the authors work on investigating different 'SSHA determination schemes', but this does not really question the overall method of using the lowest points, which are to most likely noise/speckle.**

**Response:** Thank you for the valuable comments. Figure 5 shows the normal distribution of radar freeboard difference between HY-2B and CS-2. We found that the total radar freeboard from HY-2B is slightly lower than for the AWI CS-2 products ( $-0.0068 \pm 0.14$  m). The FYI radar freeboard from HY-2B is slightly higher than the AWI CS-2 products ( $0.0055 \pm 0.13$  m). But the MYI radar freeboard from HY-2B is slightly lower than the AWI CS-2 products ( $-0.037 \pm 0.12$  m). A higher radar freeboard is retrieved by this method in early winter since more points within the segment are lead; a lower radar freeboard is retrieved in late winter and spring since more points within the segment are floe. The HY-2B MYI is thinner than AWI CS-2. As the lead points in the MYI region are sparser

than those in FYI. To achieve the minimum error in radar freeboard, we investigate different “SSHA determination schemes”.

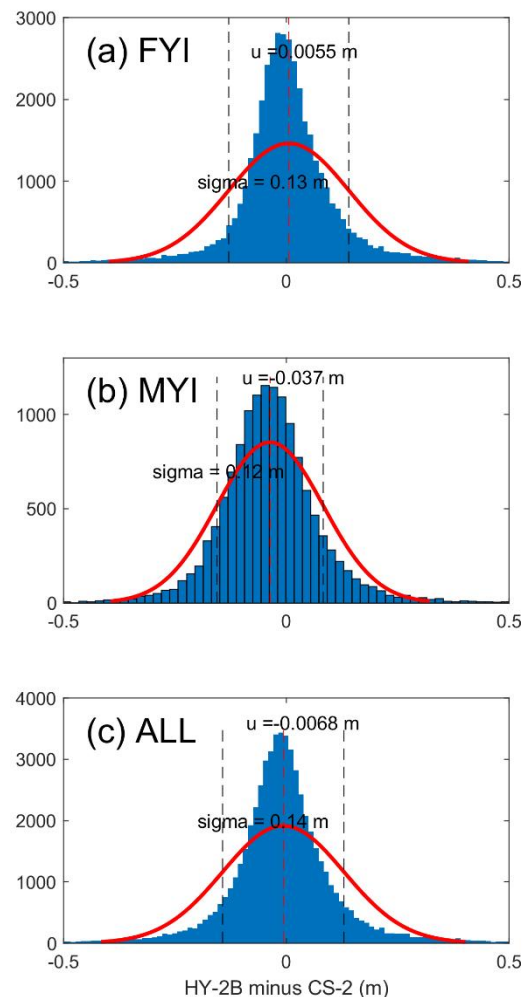

Figure 5. Normal distribution of radar freeboard differences between HY-2B and CS-2 from Oct 2019 to Apr 2020 and from Oct 2020 to Apr 2021, (a) FYI, (b) MYI, (c) ALL.

- **And how can you be sure this methodology is applicable for radar freeboards – especially as you are already observing this biasing of the HY-2B SSHA?**

**Response:** Thank you for the valuable comments. As compared to the two previous approaches, the method of the 9 (or 15) lowest points is capable of retrieving Arctic sea ice freeboards with high accuracy in SGDR products. Therefore, we adopt it to retrieve Arctic radar freeboards. The SGDR products had been retracked by the Brown model. And the valid measurement points are sparse, resulting in the error of nearest interpolation is higher than the error of the method of 9 (or 15) lowest points.

**GC1:** I appreciate that the authors have mentioned in the conclusion that using lead/floe discrimination is expected to be future work, but **if you are already aware of several limitations of the applied methodology (and your results also show this in the comparison with Operation IceBridge data), then I would expect a more exhaustive discussion on the applicability of this method.**

**Response:** Thank you for the valuable comments. A lower radar freeboard is retrieved in late winter and spring, especially in MYI region since more points within the 25 km segment are floe. Radar freeboard might be low in the MYI region with a mean deviation of -0.037 m, as shown in Figure 5. This method also cannot reliably capture the seasonal variation of the radar freeboard. Since the radar freeboard is lower in March and April than it actually is (Line 260-267, 316-321).

**GC2:** I do believe that this paper would benefit from investigating the actual waveforms of the radar altimeter to assess the sea ice thickness retrieval ability. Other papers that have assessed such for new sensors (e.g., AltiKa or Sentinel-3) have both employed a lead/floe discrimination algorithm and derived freeboard from here (Armitage and Ridout, 2015; Shen et al., 2020). **I encourage the authors to conduct such an analysis in case the radar waveforms are available for the authors. It would not require the authors to compute elevation afterwards using a new or different re-tracker but would simply provide a way of filtering and selecting ‘true’ leads (after validating the analysis with e.g., SAR or optical data). From there, they can use the leads to interpolate between and compute the SSHA in a more robust manner. This will also likely provide more comparable freeboard observations. I think such an analysis is crucial to assess HY-2B’s retrieval ability.**

**Response:** Thank you for the valuable comments. In SGDR product, SSHAs interpolated from PP values greater than 10 did not yield satisfactory results, as shown in Figure 2 and 3. In addition, we attempted to extract leads using MODIS lead products, but failed to attain the reasonable Arctic radar freeboard, as shown in Figure 4 and 5. **As a result of using the HY-2B L1 product, we first tried to extract lead by using PP values greater than 15 and to obtain SSHA using nearest interpolation. The Arctic radar freeboard of HY-2B L1b using the retrack algorithm of TFMRA 50 is shown in Figure 6. The retrieved Arctic radar freeboard is reasonable compared with the SGDR product, which will be described in detail in subsequent articles.** With more available lead measurements, the quality of the interpolated SSHA will be improved, resulting to retrieve reasonable radar freeboard. Meanwhile, we use an implementation of the Threshold First Maximum Retracker Algorithm (TFMRA) to estimate the range to the main scattering horizon for each waveform. The retrack algorithm is different from the Brown modal. Moreover, it is difficult to obtain reasonable radar freeboard using SGDR products since it has sparse measurement points and the error of interpolation SSHA is larger than the method of 9 (or 15) lowest points.

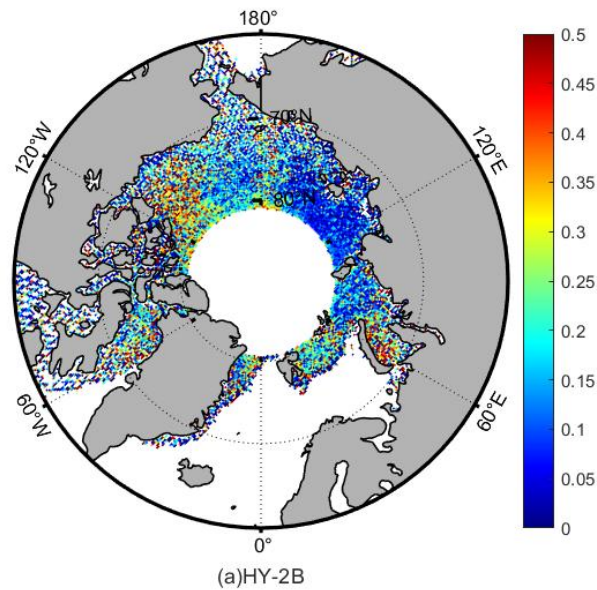

Figure 6. Radar freeboard retrieved by PP value greater than 15 using HY-2B L1 data in January 2020.

**GC3:** The study also does not discuss much regarding why CS2 and HY-2B could be different, but merely states that they are. Several aspects could contribute to this e.g., change in footprint or retrieval methodology (re-tracking and SSHA/freeboard retrieval). I do not believe the authors have discussed this aspect thoroughly enough to truly show that HY-2B is ‘reliable and consistent with CS2’, even if they make a short sentence regarding re-trackers in the conclusion. However, studies have shown that change of re-tracker alone for CS2 introduce significant differences (e.g., Ricker et al. 2014, Landy et al. 2021 etc.), so simply comparing freeboard products from two different satellites using different methods all together warrants at least a discussion.

**Response:** Thank you for the valuable comments. We think there are three reasons for these discrepancies. Firstly, the SGDR products have been retracked for Brown model, which isn’t suitable for the retrack of sea ice. Secondly, the SGDR products have sparse effective data points in each track, resulting in rare lead points being extracted using these two methods as well. Consequently, there is a significant error in the interpolation of the SSHAs caused by the rare leads. The error of interpolation SSHA is larger than the assumption of 9 (or 15) lowest points. Thirdly, we didn’t classify the floe and lead, but Robert et.al (2014) used waveform characteristics to accurately distinguished floes and leads (Line 285-287, 345-346).

**GC4:** Overall, I believe the discussion must be expanded. The results of the study are primarily presented, but not discussed in further detail including the aspects that are causing some of these large discrepancies. Especially the less encouraging results with OIB and discrepancies between both HY-2B/CS2 and HY-2B/IS2 should be discussed rather than only presented. What are causing these differences? What do we expect? What will impact this - spatial/temporal coverage? Measurement modes? There are



many differences between CS2 and HY-2B that could be causing the discrepancies, and while there is some consistency between HY-2B and CS2, this should still be discussed. It seems the authors are focusing more on positive/agreeable results than the more disheartening ones.

**Response:** Thank you for the valuable comments. We think there are three reasons for these discrepancies. Firstly, the SGDR products have been retracked for Brown model, which isn't suitable for the retrack of sea ice. Secondly, the SGDR products have rare effective data points in each track, resulting in rare lead points being extracted using these two methods as well. Consequently, there is a significant error in the interpolation of the SSHAs caused by the rare leads. Thirdly, we didn't classify the floe and lead, but Robert et.al (2014) used waveform characteristics to accurately distinguish floes and leads (Line 285-287, 345-346). We expect to use SGDR products to retrieve sea ice freeboard and provide experience for a more comprehensive assessment of HY-2B application potential using the L1 data.

The orbital inclination and the satellite altitude will affect the coverage area and repeat cycle of the satellite. The measurement mode of the satellite will affect the size of the measurement footprint. These will affect the spatial and temporal resolution of sea ice freeboard products.

The spatial patterns of the two sea ice thickness products exhibited broad agreement; thicker sea ice occurred north of the Canadian Archipelago, while thinner sea ice occurred in the Eurasian continental marginal sea and Baffin Bay. Since the height of the lead is usually lower than the height of the adjacent floes, this method is reasonable to where there are many lead points in the 25 km segment (Line 260-261).

**GC5:** I also wondered why the authors did not compare with Sentinel-3, since Sentinel-3 has the same coverage (till 81.5° N/S) as HY-2B? I know that Sentinel-3's dedicated Sea Ice preprocessors have become available in August 2022 (<https://scihub.copernicus.eu/dhus/#/home>, they can be found by selecting the product types "SR\_2\_LAN\_HY", "SR\_2\_LAN\_SI", "SR\_2\_LAN\_LI" (respectively for Hydrology, Sea Ice and Land Ice), and that they will reprocess whenever possible aiming for end 2022. It might be that it is not available for the period of the study and in case they are not, this could be a suggestion for a future comparison study as well.

**Response:** Thank you for the valuable comments. We will conduct a comparative study between HY-2B and Sentinel-3 using HY-2B L1 data.

**Specific comments:**

*Overall*

There appears to be some issues with the referencing/citation software used throughout the article. In several instances (e.g., line 150, “Rasmus Tonboe et al. (2016)”); line 158, “Signe et al., (2021)”) the citation is written with either both first and last name of the first-author, or by only first name of the first author. This should be corrected – while it may be an issue with LaTeX, I believe it is the responsibility of the author to correct this.

**Response:** Thank you for the valuable comments. We corrected all author names throughout the manuscript. We have revised ‘Thomas, D. N’ to ‘Thomas’ (line 29), ‘R. Ricker’ to ‘Ricker’ (line 52) and ‘Rasmus Tonboe’ to ‘Rasmus’ (line 144).

**I also encourage you to do a thorough proof-reading and edit, especially in the results, discussion, and conclusion sections. There are many unnecessary repetitions, and by removing these and constraining the text, it would improve the readability of the manuscript.**

**Response:** Thank you for the valuable comment. We have revised the manuscript to improve the readability of the manuscript (red fonts in the results, discussion, and conclusion sections).

**All acronyms should be checked whether they are properly named and that they are explained when appearing first in the text. I have written some examples in ‘technical corrections’ , but the authors should check the entire manuscript.**

**Response:** Thank you for the valuable comment. We have checked all acronyms in the entire manuscript.

### *Figures and tables*

**The manuscript includes a lot of figures and tables. I encourage the authors to consider ways to limit the figures/tables and more concisely present the results. Also, some figures could be provided in an appendix or as supporting information.**

**Response:** Thank you for the valuable comment. We have combined figure 1 and figure 2, figure 7 and figure 9, and figure 10 and figure 11 (figure 1, figure 7, figure 8). We have replaced table 2 with equation (1) (Line 187).

**Not all figures include sub-figure labels (e.g., Figure 4). Also, several figures have sub-figure labels given in the x-axis labels – I encourage the authors to include the sub-figure labels in the top left corner instead. However, in case they keep the current format, they should include a space between the sub-figure label and the x-axis label. Also, the manner of which units are displayed in the labels and in legends do not follow The Cryosphere guidelines (e.g., currently have no spaces between the units and the numbers).**

**Response:** Thank you for the valuable comment. We have supplied the sub-figure labels in figure 4. We also have kept a space between the units and the numbers in all figures.

**Figure 6, 8, 14, 15:** Consider a different colormap to ensure readers with color vision deficiencies can correctly interpret your findings (as per The Cryosphere submission guidelines). ‘Jet’ or ‘rainbow’ are not encouraged as colormaps. Also, I think the maps are too small – it’s hard to see what is going on. I suggest enlarging the maps and use only 1 color-bar for the entire map. This will reduce the space between the maps, allowing to increase the size too.

**Response:** Thank you for the valuable comment. We have revised the colormap of figure 5, 6, 11 and 12 with only 1 color-bar for the entire map.

**Figure 1 + 2, 7 + 9, and 10 + 11:** I suggest combining the figures – just to reduce the sheer number of figures. It would just generate several subplots. This would of course require some slight alteration of the text to ensure that the sequence of which figures are referenced are still in the correct order.

**Response:** Thank you for the valuable comment. We combine figure 1 and figure 2, figure 7 and figure 9, and figure 10 and figure 11. We also make some alteration of the text to ensure that the figures are referenced are still in the correct order.

### *Open data and research*

I was not able to access the FTP folder with the SDGR HY-2B data; neither using explorer nor filezilla. Therefore, I was not able to investigate the data available nor whether potential lower-level products were available for the authors to conduct a waveform analysis. I encourage the authors to ensure the data is available through the link, and/or provide the actual data used in the publication through a database (raw and processed data if possible) with associated DOI. I also encourage the authors to make the code available for reproducibility and transparency. However, I thank the authors for providing the link to all other data including date of access! Refreshing to see in a publication and right in line with the expectations of the science community regarding open research.

**Response:** We are sorry for the confusion. You may need to register an account by <https://osdds.nsoas.org.cn/register>. Then, you can enter your account and password to log in to the official website to access the FTP folder with SDGR HY-2B data using filezilla (<ftp://osdds-ftp.nsoas.org.cn/>). The SGDR HY-2B data can also be accessed through <https://osdds.nsoas.org.cn/MarineDynamic/> (Figure 7). You may need a VPN if you were not successful in logging in. We will share the main code in the internet.

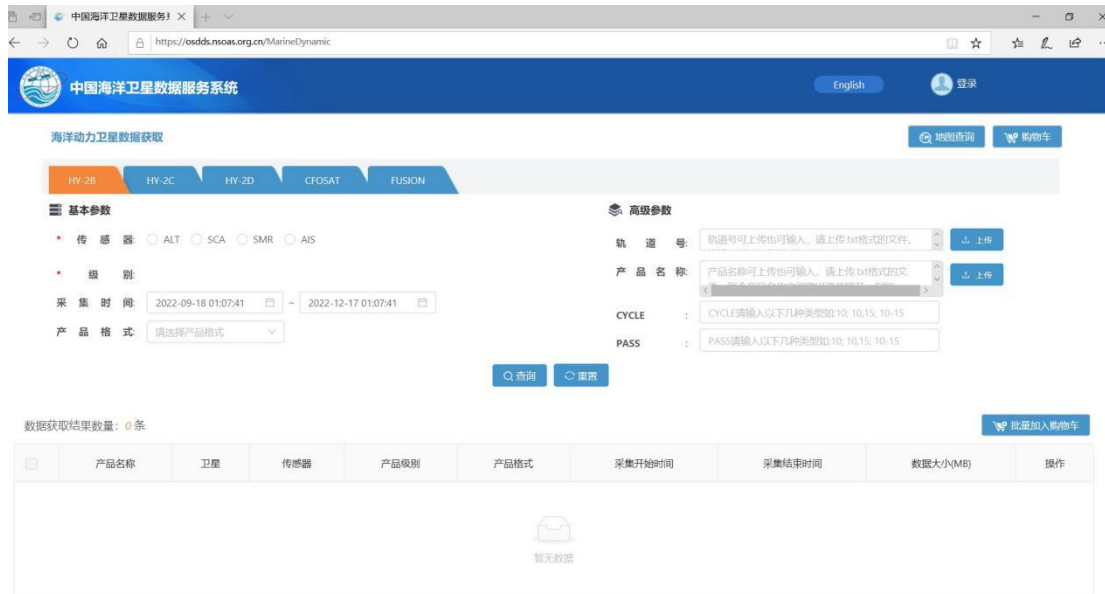

Figure 7. The website of HY-2B satellite.

### *Abstract*

**I encourage the authors to shorten the abstract. 7 lines about the general background of satellite altimetry and using more than 10 lines on a summary of the results seems a bit too much. At the same time, I believe only the main results (with one or two numerical results) would be enough to underline the points made. Future work/limitations of study should be provided in the abstract as well.**

**Response:** Thank you for the valuable comment. We have revised the abstract to ‘With the continuous development of the China Ocean Dynamic Environment Satellite Series (Haiyang-2, HY-2), it is urgent to explore the potential application of the HY-2B in Arctic sea ice thickness retrievals. In this study, we first derive the Arctic radar freeboard and sea ice thickness during two cycles (from October 2019 to April 2020 and from October 2020 to April 2021) using HY-2B radar altimeter and compare the results with the Alfred Wegener Institute (AWI) CS-2 products. We evaluate our HY-2B sea ice freeboard and thickness products using Operation IceBridge (OIB) airborne data and ICESat-2 products. Finally, we estimate the uncertainties in the HY-2B sea ice freeboard and sea ice thickness. The radar freeboard deviation between HY-2B and CS-2 is within 0.02 m, whereas the sea ice thickness deviation between HY-2B and CS-2 is within 0.2 m. The HY-2B radar freeboards are generally thicker than AWI CS-2, except in spring (March and April). In spring, more of the lowest 15 points within 25 km segment are likely to originate from floes, while more points may originate from leads in early winter. We also find that the deviations of radar freeboard and sea ice thickness between HY-2B and CS-2 over MYI are larger than over FYI. The correlation between HY-2B sea ice freeboard retrievals and OIB values is 0.77, with a root mean square error (RMSE) is 0.13 m and a mean absolute

error (MAE) is 0.12 m. The correlation between HY-2B sea ice thickness retrievals and OIB values is 0.65, with a RMSE is 1.86 m and a MAE is 1.72 m. The HY-2B sea ice freeboard uncertainty values range from 0.021 m to 0.027 m, while the uncertainties in the HY-2B sea ice thickness range from 0.44 m to 0.67 m.' (line 1-23).

### *Introduction*

**Line 52: “Sea ice thickness, as the third dimension of sea ice (⋯)” : what is meant by sea ice density here? Surely, sea ice thickness can in combination with sea ice area be used to calculate the sea ice volume, but sea ice density cannot be combined with sea ice thickness to compute sea ice volume.**

**Response:** We apologize for the mistake. We have revised ‘sea ice density’ to ‘sea ice area’ (line 40).

**Line 68. “Shen et al. (2020) (⋯)” : Lawrence et al. (2019) showed that this was mostly a result of the processing chain of Sentinel-3 not having included zero-padding or Hamming-weighting. I believe this should be mentioned, since the study of Lawrence et al. (2019) in which these corrections were applied showed greater consistency.**

**Response:** Thank you for the valuable comment. We have revised ‘Shen et al. (2020) retrieved Arctic sea ice freeboard data based on Sentinel-3A records and analyzed the differences and consistency between the results and the corresponding CS-2 data. The results showed that the Sentinel-3A sea ice freeboard was generally lower than that indicated by CS-2’ to ‘Shen et al. (2020) used Sentinel-3A to retrieve Arctic sea ice freeboard and analyzed the differences and consistency between Sentinel-3A and CS-2. The results showed that the Sentinel-3A sea ice freeboard was generally lower than that retrieved by CS-2. The differences between Sentinel-3A and CS-2 are mostly a result of the processing chain of Sentinel-3 not having included zero-padding or Hamming-weighting. The study of Lawrence et al. (2019) in which these corrections were applied showed greater consistency’ (line 55-59).

### *Data*

**Line 105. What type of re-tracking algorithm is used and what are potential impacts of using this re-tracker (limitations that other studies have shown? etc.)?**

**Response:** Thank you for the valuable comment. The SGDR products have been retracked for the Brown model, which is not suitable for sea ice. The inapposite retrack algorithm may result the residual error and abnormal values.

**Line 113-117: Baseline-D ESA and AWI use different re-tracking algorithms which will have different results. As such, your comparison is not ‘consistent’ in the way that the products are not the same and any differences you observe between the HY-2B and AWI/ESA could be different depending on re-tracker. A suggestion could be to**

investigate the Climate Change Initiative (CCI) products, where both trajectory and gridded products are available – and they use the same processing chain ([ftp://ftp.awi.de/sea\\_ice/projects/cci/crdp/v3p0-rc1/cryosat2/nh/](ftp://ftp.awi.de/sea_ice/projects/cci/crdp/v3p0-rc1/cryosat2/nh/)).

**Response:** Thank you for the valuable comment. Due to the trajectory products of CCI don't contain SSHA and the height of floe before subtracting SSHA, we can't compare them with HY-2B, so we adopt the Baseline-D products of ESA.

**Line 162. How come you use DTU18MSS and not the new (and likely improved) DTU21MSS? Available here (<https://doi.org/10.11583/DTU.19383221.v1>): [https://data.dtu.dk/articles/dataset/DTU21\\_Mean\\_Sea\\_Surface/19383221](https://data.dtu.dk/articles/dataset/DTU21_Mean_Sea_Surface/19383221)**

**Response:** Thank you for the valuable comment. Since DTU21 (the version of 1 min) is much larger than DTU18 (the version of 2 mins), calculation efficiency is low. According to Figure 8 and Figure 9, the DTU 21 does not significantly improve our results. Therefore, we used the DTU 18 (the version of 2 mins) to process the HY-2B to compare with AWI.

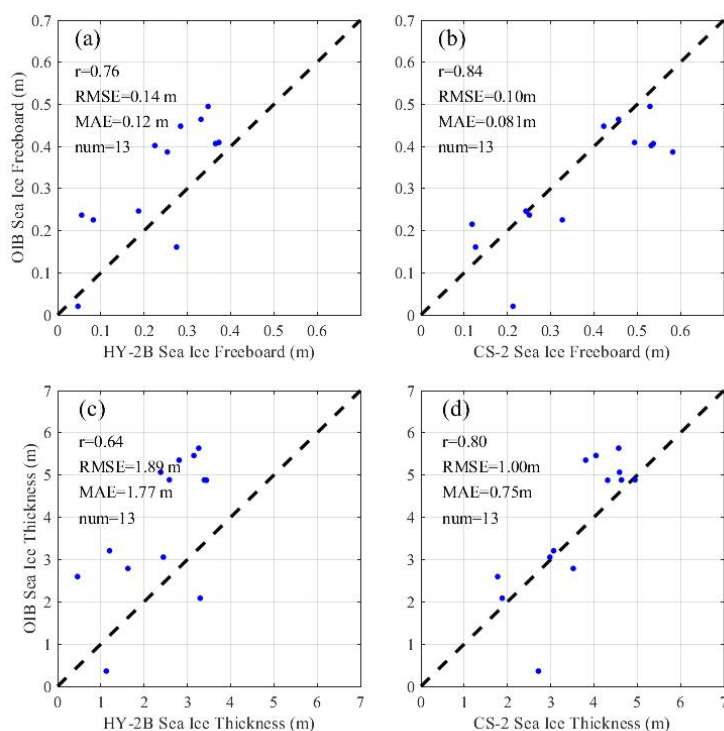

Figure 8. Comparison between two kinds of sea ice freeboard products and the OIB sea ice freeboard values collected in April 2019: (a) the HY-2B sea ice freeboard retrieved by DTU 21 and (b) the AWI CS-2 sea ice freeboard.

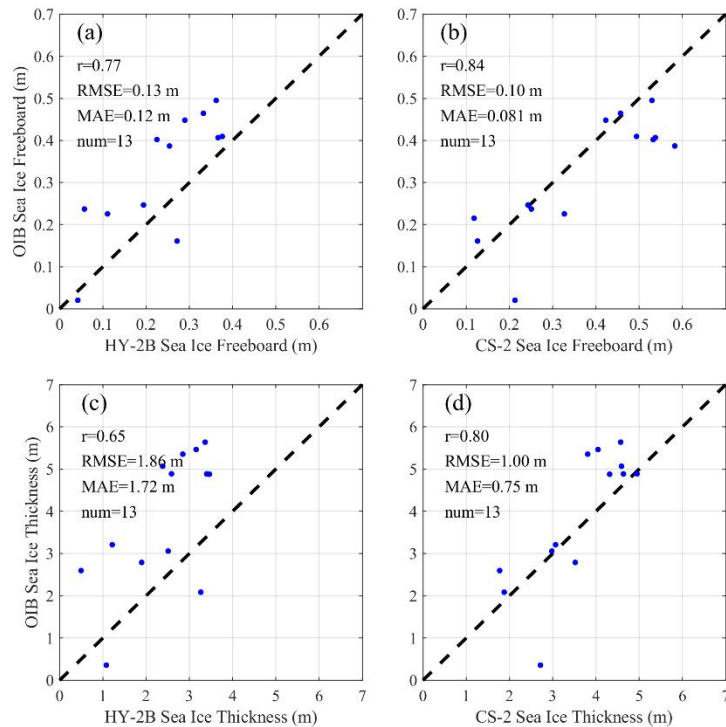

Figure 9. Comparison between two kinds of sea ice freeboard products and the OIB sea ice freeboard values collected in April 2019: (a) the HY-2B sea ice freeboard retrieved by DTU 18 and (b) the AWI CS-2 sea ice freeboard.

**Line 164.** What is meant by “this model can precisely determine the instantaneous elevation of lead”? I do not believe that the referenced study (Skourup et al., 2017) has stated this. A mean sea surface represents the sea level due to constant phenomena and represents the position of the ocean surface averaged over an appropriate time period to remove annual, semi-annual, seasonal, and spurious sea surface height signals – I am not sure what you mean by the statement. Surely, if the model could determine the instantaneous elevation of a lead, we could just interpolate the model along the floe observations and not care about the individual lead observations along the track? The sentence should be corrected.

**Response:** We apologize for the confusion. To avoid misunderstanding, we have revised ‘this model can precisely determine the instantaneous elevation of lead’ to ‘After removing the MSS, we are able to precisely determine the instantaneous elevation of lead’ (line 158-159).

**Line 190.** You already have a lot of tables. Instead of providing a table with the exact densities for each month, instead you could consider just writing the equation in the section.

**Response:** Thank you for the valuable comment. We have replaced table 2 with equation (1) (line 178).

## *Methodology*

**Section 3.1: Figure 3 shows a removal of 'outliers' using  $\pm 1$  m, but this is not mentioned in the text.**

**Response:** Thank you for the valuable comments. We have revised 'The relative surface elevation,  $h_r$ , was obtained after eliminating the residuals, as shown in Fig. 4(a) and (b) 'to 'In addition, the relative surface elevations,  $h_r$ , outside the range  $+1.0$  m to  $-1.0$  m are removed from processing, as shown in Fig. 3 (a) and (b) '(line 200-201).

**Line 198. What is meant by "invalid values". How are they considered invalid?**

**Response:** 'Invalid values' is 'nan'. The original data may contain nan for each parameter, such as range, dry tropospheric delay correction and wet tropospheric delay correction. After subtraction, we removed the nan results (line 187).

**Line 198-201. Which exact corrections (providers) are you using? This should be stated.**

**Response:** Thank you for your valuable comments. We have revised 'it was necessary to consider the dry and wet tropospheric delay correction, inverse barometric correction, ionospheric correction, ocean tidal correction, equilibrium tidal correction, ocean load tidal correction, earth tidal correction and polar tidal correction when calculating the surface elevation' to 'it was necessary to consider the dry and wet tropospheric delay correction (National Centers for Environmental Prediction, NCEP), inverse barometric correction (NCEP), ionospheric correction (National Satellite Ocean Application Service, NSOAS), ocean tidal correction (Goddard Space Flight Center, GSFC, GOT4.10c), ocean load tidal correction (GSFC, GOT4.10c), earth tidal correction (Cartwright et al., 1973) and polar tidal correction (Wahr, 1985) when calculating the surface elevation' (line 188-192).

**Line 207-213. The purpose of removing the residuals should be stated. This is not commonly applied for the lead/floe retrieval methodologies, and as such can add to the reasons why the results differ.**

**Response:** According to your valuable comments, we supply the reason of removing the residuals. 'The residual error may be caused by the error of precise orbit determination and different tracking algorithm' (line 198-199).

**Line 215. Why are you assuming the SSHA to be 0? And what is the impact of this? Figure 4+5 show that SSHA is not necessarily zero (zero-elevation is only relative to MSS). Instead, could you consider nan (not-a-number) the data and just interpolate where data is not available?**

**Response:** Thank you for the valuable comments. We tried to set it as nan value and interpolated it along track. We found that the correlation between the retrieved sea ice



freeboard and OIB sea ice freeboard was 0.77, RMSE was 0.13 m, and MAE was 0.12 m. Therefore, we updated our method and re-found the optimal threshold of 15 points within 25 km segment, as shown in table 7 and 8 (in the manuscript). If there are more than 15 points within 25 km section, we take the average of the 15 lowest values as the SSHA, otherwise set as nan, and interpolate the SSHA along track.

If the points in the 25 km segment are less than 15, we assume the SSHA to be 0, which is maybe higher than the average of lowest points (negative). The HY-2B radar freeboard retrieved by the assumption of SSHA to be 0 is lower than the radar freeboard retrieved by the interpolation of SSHA, as shown in Figure 10.

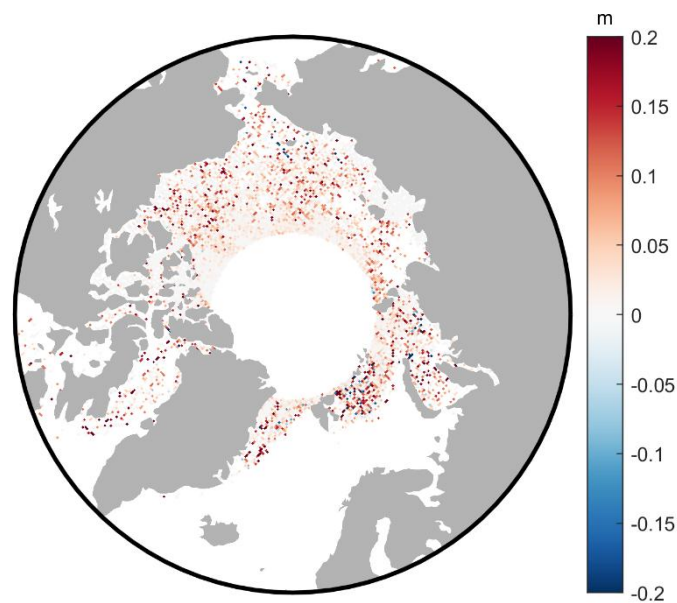

Interpolation minus Assumption

Figure 10. The difference between the radar freeboard retrieved by assumption (If there are more than 9 observation points per 25-km segment in every track, the average of the 9 lowest values is taken as the SSHA. Otherwise, the SSHA is set to 0.) and the radar freeboard retrieved by interpolation (If there are more than 9 observation points per 25-km segment in every track, the average of the 9 lowest values is taken as the SSHA. Otherwise, the SSHA is set to nan and nearest interpolation is performed along track.) in April 2020.

As the points in the 25-km segment are less than 15, we attempted to interpolate SSHAs that are considered as nan. We used the AWI snow depth to obtain IS-2 sea ice freeboard and HY-2B and CS-2 sea ice freeboards. Figure. 11 shows monthly comparisons of sea ice freeboard between HY-2B retrieved by interpolation and IS-2 and between CS-2 and IS-2, respectively. The RMSE and MAE of interpolation are lower than the assumption. Therefore, we adopt the interpolation of SSHA to retrieve Arctic radar freeboard.

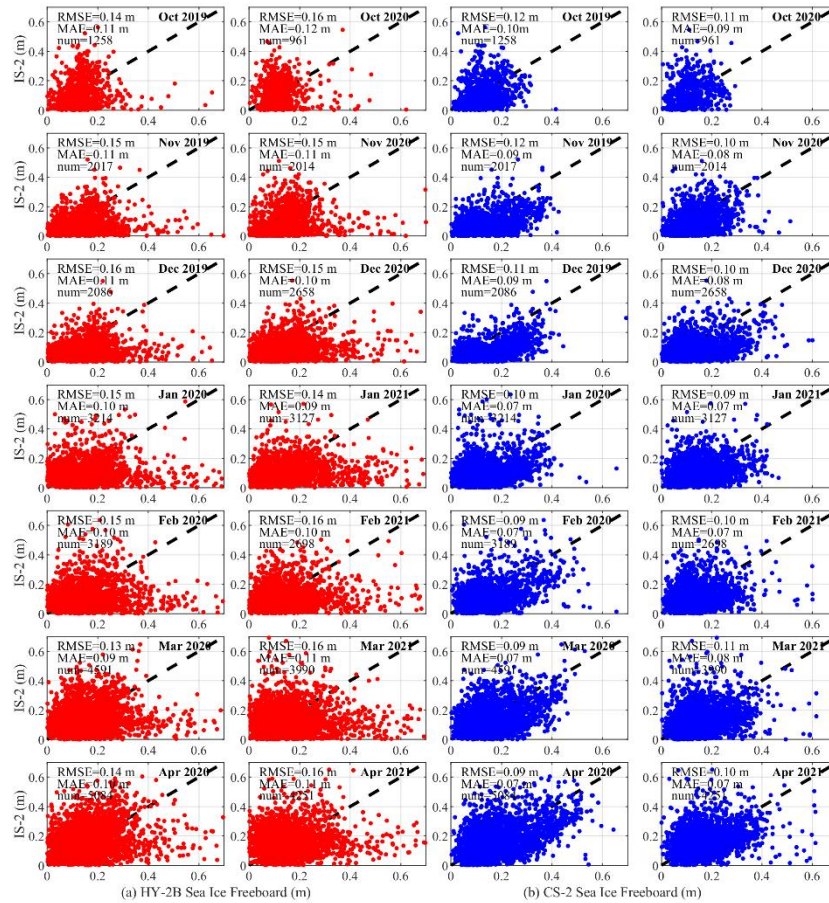

Figure 11. Monthly comparisons between HY-2B sea ice freeboard retrieved by interpolation and ICESat-2 sea ice freeboard and between CryoSat-2 sea ice freeboard and ICESat-2 sea ice freeboard: panels (a) show comparisons between HY-2B and ICESat-2 from October 2019 to April 2020 and from October 2020 to April 2021, and panels (b) shows comparisons between CS-2 and ICESat-2 from October 2019 to April 2020 and from October 2020 to April 2021.

Line 226. Isn't the 0.22 value depending on snow density and thus varying, even in the AWI product? It is based on slower wave propagation, given by  $(\frac{c}{c_s} - 1)$ , where  $c$  is the speed of light and  $c_s$  is the speed of light through snow. Here, where depends on the snow density (which you vary when using Mallet et al. (2020)). If so, this should be corrected. If not, please explain exactly what this value is and where it comes from.

Response: Thank you for the valuable comments. We have revised ' $f = f_r + 0.22 \cdot h_s$ ' to ' $f = f_r + (\frac{c}{c_s} - 1) \cdot h_s$ ' and ' $c_s = c \cdot (1 + 5.1 \cdot 10^{-4} \rho_s)^{-1.5}$ ' (line 201 and 204).

Line 229. How is the gridding performed?

**Response:** We have revised 'We gridded the sea ice thickness to the 25-km polar stereographic grid with a temporal resolution of 1 month' to 'To obtain monthly grid values, we averaged all thickness measurements within a 25 km radius of the center of each grid cell, with all points receiving equal weighting' (line 257-258).

### *Results*

**Line 237-249:** "Fig 5(a) (...)." This entire paragraph could benefit from some rephrasing, as it was confusing and long to read. Also, check the manuscript guidelines for The Cryosphere again to ensure that the way you write the different expressions (" $0\pm 0.31\text{m}$ ") follows the guidelines.

**Response:** Thank you for the valuable comments. We have revised ' $0\pm 0.31\text{ m}/0\pm 0.25\text{ m}$  and  $0.081\pm 0.17\text{ m}/0.087\pm 0.25\text{ m}$ ' to '**0 m/0 m and 0.081 m/0.087 m**' (line 240). Also, we have revised ' $-0.26\pm 0.13\text{ m}/-0.20\pm 0.18\text{ m}$  and  $-0.051\pm 0.029\text{ m}/-0.069\pm 0.066\text{ m}$ ' to '**-0.21 m/-0.11 m and -0.051 m/-0.069 m**' (line 242-243).

**Line 264-265.** I think you need to consider what you mean by 'smallest' and 'largest' deviation. Sure, in actual numbers, -2.4 cm is smallest, and 1.9 cm is largest. But the deviation from zero must mean that the -2.4 cm is largest! So, this needs to be rephrased for clarity.

**Response:** Thank you for your valuable comment. We have revised the description based on new statistics values (line 257-289).

**Line 336 -358.** You mention the Kwok snow depth product is used, but in Figure 3 you mention that the AWI snow depth is used for the processing of the radar freeboards. Then, later you mention that the Kwok snow depth is used for the ICESat-2 freeboards to obtain the sea ice freeboard and for the CS2 to obtain sea ice freeboard. How come you decide to use this snow depth product suddenly, and not just use the AWI snow depth throughout?

**Response:** We apologize for the confusion. We have changed to use AWI snow depth to obtain sea ice freeboard and sea ice thickness. We have removed the description of Kwok snow depth in the manuscript.

**Line 274-275.** The fact that HY-2B modal freeboard is thicker than the mean is not expected – we usually expect a skewed distribution with an abundance of thinner freeboards compared to the thicker freeboards. This should be discussed further.

**Response:** Thank you for your valuable comment. Before calculating the modals of radar freeboard, we obtain the HY-2B and CS-2 radar freeboard and sea ice thickness with only three decimal places. If it is close to the normal distribution, the mode maybe close to the mean, or even slightly greater than the mean (line 305-307).

**Line 337-338: Be careful when discussing spatial resolution of IS2. The footprint of IS2 is approximately 11 m, yes, but the ATL10/ATL20 products are processed data that is not of this spatial resolution.**

**Response:** Thank you for a kind reminder. We used the ATL 20 products to validate the HY-2B and CS-2 sea ice thickness products. The ATL 20 products are monthly grid products, and the spatial resolution is 25 km. We would be careful to discuss the spatial resolution of IS-2.

**Line 358. You mention sea ice thickness error? What is meant by this – this has not been discussed previously.**

**Response:** Thank you for the valuable comments. The sea ice thickness error is meant that RMSE and MAE between the HY-2B sea ice thickness and CS-2 sea ice thickness. We have revised “The sea ice thickness error was thus related not only to the sea ice freeboard and snow depth values but also to the sea ice type and snow density” to “The RMSE and MAE of sea ice thickness are thus related not only to sea ice freeboard and snow depth but also to sea ice type and snow density” (Line 353-354).

**Figure 13. For almost all subfigures, we observe HY-2B to generate significantly thicker sea ice thickness than IS2 (CS2 also does not observe this behavior). This seem to showcase that some overestimation of thickness from HY-2B, which I think could be discussed more in the text for the IS2 comparison.**

**Response:** Thank you for the valuable comments. We think that the overestimation of thickness from HY-2B may be caused by the error of precise orbit determination, Brown tracking algorithm and the algorithm of SSHA determination. In addition, the differences of measurement mode and footprint size maybe result the discrepancies between HY-2B and IS-2. We supplied the discussion in the text for the IS-2 comparison (line 346-348).

### *Discussion*

**Line 371-374. Long and confusing sentence, however it sounds like it is saying that in general HY-2B is observing smaller freeboards than the AWI freeboards – but, when comparing otherwise you said that HY-2B was higher than CS2 freeboard (I assume this is the ESA observations then). I suggest you rephrase this sentence for clarity, and then discuss further the fact that you are comparing observations with different re-trackers – what can you really get from this? And are you comparing along-track or gridded? This should also be mentioned.**

**Response:** Thank you for your valuable comments. We have revised to ‘The SSHA values of Scheme 8 are largest, both are greater than -0.1 m. The mean deviations of gridded radar freeboard between HY-2B and CS-2 are all less than 0, indicating that the HY-2B radar freeboard retrievals are generally lower than the AWI CS-2 radar freeboards.

In addition, the MAE of Scheme 8 is larger than that obtained under Scheme 7' (line 367-370).

**Line 386.** If you are following Mallet et al. (2020), the 0.22 value should be changing with density.

**Response:** Thank you for your valuable comments. We have revised ' $f = f_r + 0.22 \cdot h_s$ ' to ' $f = f_r + \left(\frac{c}{c_s} - 1\right) \cdot h_s$ ' and ' $c_s = c \cdot (1 + 5.1 \cdot 10^{-4} \rho_s)^{-1.5}$ ' (line 221 and 224).

**Line 393, Equation 8.** I am intrigued by why you are including the impact of  $+0.22 \rho_w$ , when e.g., the study of Ricker et al. 2014 did not. This may explain my comment further down regarding line 415-425. I suggest you check up on this to make sure that this is the correct partial derivative.

**Response:** Thank you for the valuable comments. We have revised the gridding uncertainty budget for radar freeboard, sea ice freeboard and sea ice thickness in equation (7) to (13) (in the manuscript).

**Line 404.** The uncertainty of sea ice densities should be cited.

**Response:** Thank you for the valuable comments. We added the cite of Alexandrov et al. (2010) (line 406).

**Line 415-425.** Something seems odd in the uncertainty determination. Ricker et al. (2014) determined freeboard uncertainties of 6 cm (12 cm) for FYI (MYI), but for sea ice thickness, they estimate 60 cm (120 cm) (increase by factor 10). This is not observed in your estimation, where the CS2 sea ice thickness uncertainty is only 12.1-15.4 cm. Also, your freeboard uncertainties to thickness uncertainties do not increase by factor 10 for HY-2B observations? Something seems off here. I suggest going through this again and ensuring that the units are correct.

**Response:** Thank you for the valuable comments. We have revised the gridding uncertainty budget for radar freeboard, sea ice freeboard and sea ice thickness in equation (7) to (13).

### *Conclusion*

**Line 442-44:** I am not convinced by this methodology, when the comparisons and correlations with OIB are so low compared with CS2. A correlation of 0.58 for HY-2B but 0.84 for CS2 for freeboards, and 0.41 for HY-2B but 0.80 for CS2 on thickness is

**quite a big difference – and for me just shows that the method used here is not that applicable for sea ice, and not reliable.**

**Response:** Thank you for the valuable comments. We are sorry for the results that are not reliable. We use the PP values to extract leads, and use them to obtain the SSHA using nearest interpolation. Finally, the result is not satisfactory. In the meanwhile, we also use the MODIC lead product to extract lead, but we don't retrieve the satisfactory result. The reason is that the valid measurement points are sparse, resulting the error of interpolation is larger than the error the average of lowest points within 25 km section. According to your valuable comments, we try to set it as nan value and interpolate it along track. We find that the correlation between the retrieved sea ice freeboard and OIB sea ice freeboard is 0.77, with a RMSE is 0.13 m, and a MAE is 0.12 m.

**Line 460-468: A lot of new information provided here which is not discussed or even commented upon in the text. I strongly encourage the authors to include a discussion (in the discussion section) on the impact of re-tracking methodology applied to the HY-2B freeboards (and how it differs from the CS2 re-tracking). There are also some considerations for what should be done in future work, which are not discussed in the text but only here. Finally, the authors conclude that they have used a sub-optimal re-tracking algorithm which is only applicable for ocean (not sea ice?). Makes me question why they did this analysis with this algorithm, when it is not suitable, and the results clearly show this too.**

**Response:** Thank you for the valuable comments. The SGDR products have been re-tracked for Brown modal. We are sorry for that we don't have the retrack values of Brown modal. We couldn't compare the retrack values of Brown modal with the CS-2. The SMLE algorithm is mainly aimed at ocean surface. The OCOG algorithm is mainly aimed at land, sea ice and ice sheet, but the OCOG data isn't contained in the SGDR product. These two re-tracking algorithms have some overlapping measurement points. We tried to explore the potential application of the SGDR product in this manuscript. We plan to reprocess the L1 data to comprehensively explore the potential of the HY-2B.

#### **Technical corrections**

**Line 113: "main" – not sure they are the only main products? The CCI product could be mentioned here. Furthermore, the upcoming releases of CryoTEMPO (<http://cryosat.mssl.ucl.ac.uk/tempo/downloads.html>) are expected to be a favorable product to be used in the future by the science community.**

**Response:** According to your valuable comment, we supplied the introductions of the CCI product and the CryoTEMPO (line 111-112).

**Line 116. What is meant by L2I? The intermediate product is not provided to the public, but rather the L2 product is.**

**Response:** According to your valuable comment, we have revised 'L2I' to 'L2' (line 113).

**Line 123. "were by " -> "were provided by".**

**Response:** According to your valuable comment, we have revised 'were by' to 'were provided by' (line 120).

**Line 148. "Denmark Technical University (DTU)" -> "the Technical University of Denmark (DTU)".**

**Response:** According to your valuable comment, we have revised 'Denmark Technical University' to 'the Technical University of Denmark' (line 142).

**Line 171. "W99" – "Warren et al. 1999 (W99)": reference the publication and explain the acronym.**

**Response:** According to your valuable comment, we have revised 'W99' to 'Warren et al. 1999 (W99)' (line 164).

**Line 171. "AMSR-2" -> "Advanced Microwave Scanning Radiometer-2 (AMSR-2)".**

**Response:** Thank you for the valuable comment. We had added the 'Advanced Microwave Scanning Radiometer-2 (AMSR-2)' (line153).

**Line 202. "were interpolated" -> "were linearly interpolated" (or however it was interpolated).**

**Response:** Thank you for the valuable comment. We have revised 'were interpolated using the SIC data' to 'were obtained using nearest interpolation' (line 193).

**Line 204. "was not used" -> "was not considered".**

**Response:** Thank you for the valuable comment. We have revised 'was not used' to 'was not considered' (line 195).

**Line 206-207. "from the obtained surface elevations of ground objects (...)": consider rephrasing this sentence, as it is not clear.**

**Response:** Thank you for the valuable comment. We have revised 'The geoid fluctuations were eliminated by subtracting the MSS height from the obtained surface elevations of ground objects' to 'The mean sea-surface (MSS) height product DTU18 (Andersen et al. 2018a; Andersen et al. 2018b) is subtracted from the geolocated surface elevations to remove the geoid fluctuations' (line 196-197).

**Line 215-216. “(...) were subtracted from the SSHA to obtain”:** The SSHA are subtracted from the segment height, not the other way around. This sentence should be rephrased.

**Response:** Thank you for the valuable comment. We have revised ‘All the observed values  $h_r$  inside each 25-km segment were subtracted from the SSHA to obtain the radar freeboard height’ to ‘The SSHA was subtracted from the observed values  $h_r$  inside each 25-km segment to obtain the radar freeboard height’ (line 208).

**Line 231: “ $\rho_{\text{seawater}}$ ” -> “ $\rho_w$ ” (following the equation).**

**Response:** Thank you for the valuable comment. We have revised ‘ $\rho_{\text{seawater}}$ ’ to ‘ $\rho_w$ ’ (line 230).

**Line 288-289. “Because the (...)”:** I wouldn’t say that the lower SSHA necessitates higher freeboards, because they are only higher if the elevations of the floes are of the same height as CS2 or higher. If the floe elevations were also lower, HY-2B would not necessarily have higher freeboards. Consider rephrasing it.

**Response:** Thank you for the valuable comment. We have revised ‘Because the HY-2B SSHAs were lower than those of CS-2, the HY-2B radar freeboards were higher than those of CS-2’ to ‘It should be noted that the HY-2B SSHAs are lower than those of the CS-2, the elevations of the floes are slightly higher than the CS-2, and the HY-2B radar freeboards are higher than those of the CS-2’ (line 288-289).

**Line 451-452. You mention sea ice error again, but you have merely referenced this by the paper of Ricker et al. (2014) and not done more sensitivity studies on this. I suggest removing this sentence or discuss this more in the text if you aim to keep it.**

**Response:** Thank you for the valuable comment. We have removed the sentence.
